# Supplementary material
Source: PubMed Central journal article supplement (PMC7484418)
Supplement: NIHMS1620932-supplement-1.pdf [file NIHMS1620932-supplement-1.pdf]

## POLYSUBSTANCE USE PATTERNS AMONG JUSTICE-INVOLVED

**Supplementary Table S1. Detailed drug use characteristics of polysubstance use involving opioids in a justice-involved sample (N=6,569)**

|                                    | Primarily Alcohol | Primarily Heroin | Less PSU | Tranquilizer PSU | Primarily Buprenorphine | Stimulant-Opioid |
|------------------------------------|-------------------|------------------|----------|------------------|-------------------------|------------------|
| <i>Opiates</i>                     |                   |                  |          |                  |                         |                  |
| Morphine                           | 14.72             | 16.68            | 11.84    | 24.21            | 14.23                   | 25.87            |
| Dialudid (Hydromorphone)           | 10.19             | 11.55            | 9.53     | 18.50            | 10.33                   | 17.09            |
| Demerol (Meperidine)               | 2.59              | 2.00             | 1.69     | 5.51             | 1.75                    | 6.70             |
| Percocet, OxyContin, Oxycodone     | 52.10             | 49.72            | 52.46    | 66.64            | 45.03                   | 59.58            |
| Codeine                            | 12.14             | 7.78             | 9.89     | 15.14            | 8.58                    | 20.21            |
| Tylenol 2, 3, 4                    | 5.71              | 2.50             | 4.34     | 6.75             | 5.07                    | 11.72            |
| Lortab                             | 47.90             | 25.10            | 42.48    | 48.69            | 30.99                   | 44.80            |
| Ultram (Tramadol)                  | 5.34              | 3.69             | 4.39     | 9.25             | 7.99                    | 9.24             |
| Fentanyl                           | 6.47              | 18.04            | 6.65     | 17.94            | 9.36                    | 22.75            |
| Opana (Oxymorphone)                | 9.87              | 15.32            | 10.95    | 19.44            | 13.65                   | 17.44            |
| Roxies, IR-30s (Roxicodone)        | 16.18             | 16.53            | 15.54    | 26.48            | 17.23                   | 22.01            |
| <i>Amphetamines</i>                |                   |                  |          |                  |                         |                  |
| Methamphetamine, speed, crank      | 43.20             | 45.23            | 49.49    | 50.65            | 52.63                   | 45.84            |
| Amphetamine, Adderall              | 9.39              | 6.66             | 7.76     | 13.18            | 10.53                   | 14.78            |
| MDMA, Ecstasy                      | 5.83              | 4.49             | 4.75     | 8.13             | 2.14                    | 11.03            |
| Ritalin, Concerta (Methyphenidate) | 3.72              | 1.68             | 2.08     | 4.58             | 3.70                    | 5.77             |
| <i>Tranquilizers</i>               |                   |                  |          |                  |                         |                  |
| Benzodiazepines                    | 32.69             | 31.36            | 26.96    | 97.57            | 28.27                   | 54.73            |
| Muscle Relaxers                    | 4.37              | 3.21             | 3.86     | 13.55            | 2.92                    | 10.28            |

Note: PSU= polysubstance use; \*all variables are significant at the p<.001 level
